# Supplementary material for: Osteoblast-intrinsic defect in glucose metabolism impairs bone formation in type II diabetic male mice
Source: eLife journal article supplement (doi:10.7554/elife.85714), 2023-05-05
Supplement: fig3-data1 [file elife-85714-fig3-data1-v2.zip]

Figure 3F Raw data

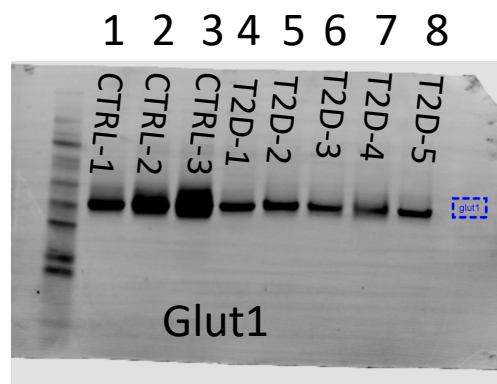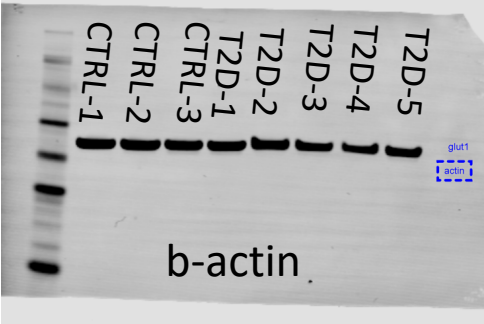

Lanes 1-6 used in figure

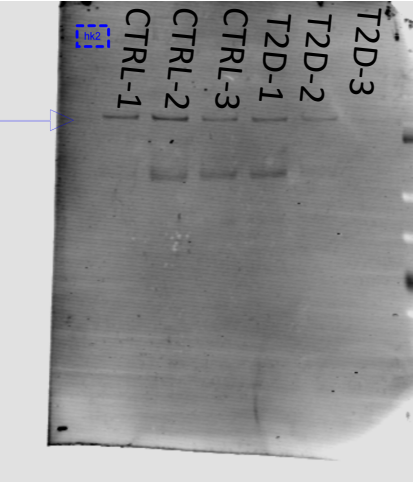

HK2  
Pfkfb3 (not presented in the figure)

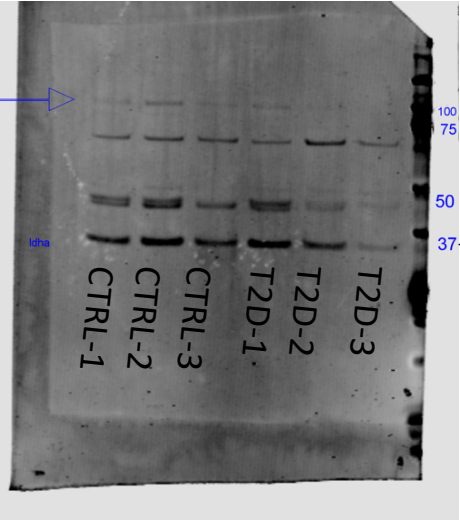

Hif1a (not presented in the figure)  
LDHA

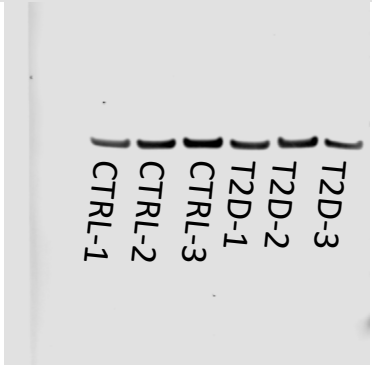

b-actin
