# Supplementary figures and images for: Osteoblast-intrinsic defect in glucose metabolism impairs bone formation in type II diabetic male mice
Source: eLife journal article supplement (doi:10.7554/elife.85714), 2023-05-05

Figure S8A raw data

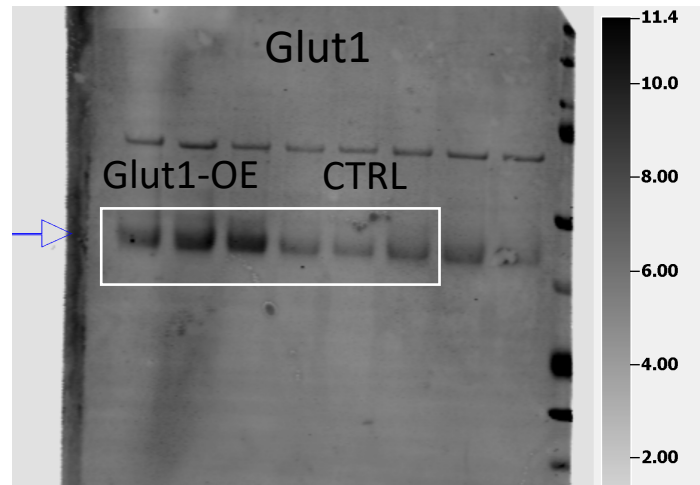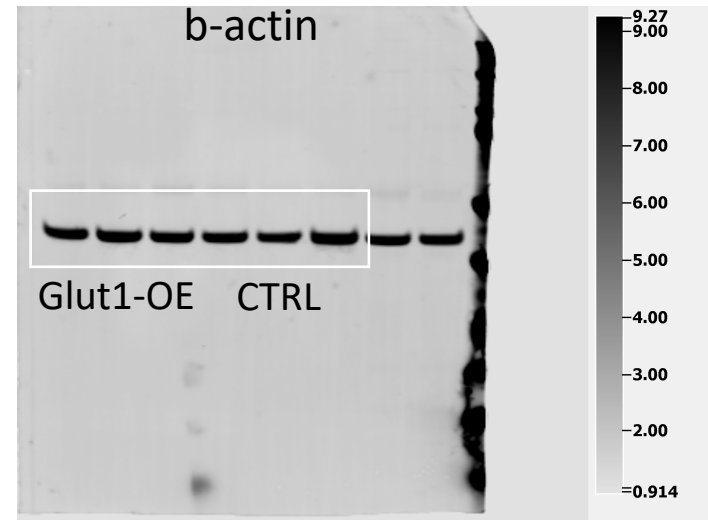

Supplement: fig7-figsupp2-data2 [file elife-85714-fig7-figsupp2-data2-v2.zip]
